# Supplementary material
Source: PubMed Central journal article supplement (PMC4386348)
Supplement: pnas.201419409SI.pdf [file pnas.201419409SI.pdf]

# Supporting Information

Donovan et al. 10.1073/pnas.1419409112

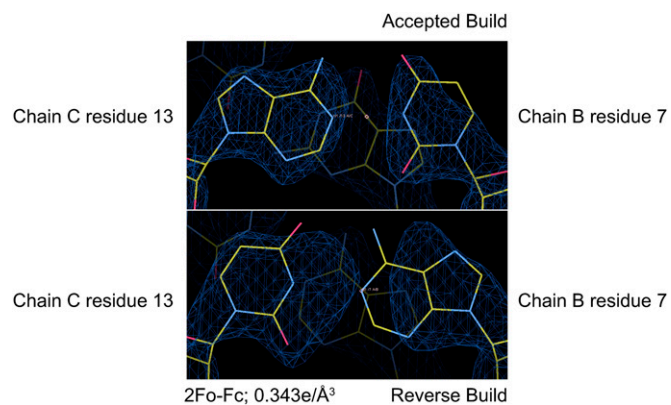

**Fig. S1.** Assignment of the dsRNA orientation in the hOAS3.DI•dsRNA19 crystal structure. The orientation of the dsRNA was determined by refining the data against build 1 (accepted) and build 2 (reverse). Biased electron density maps are consistent only with build 1.







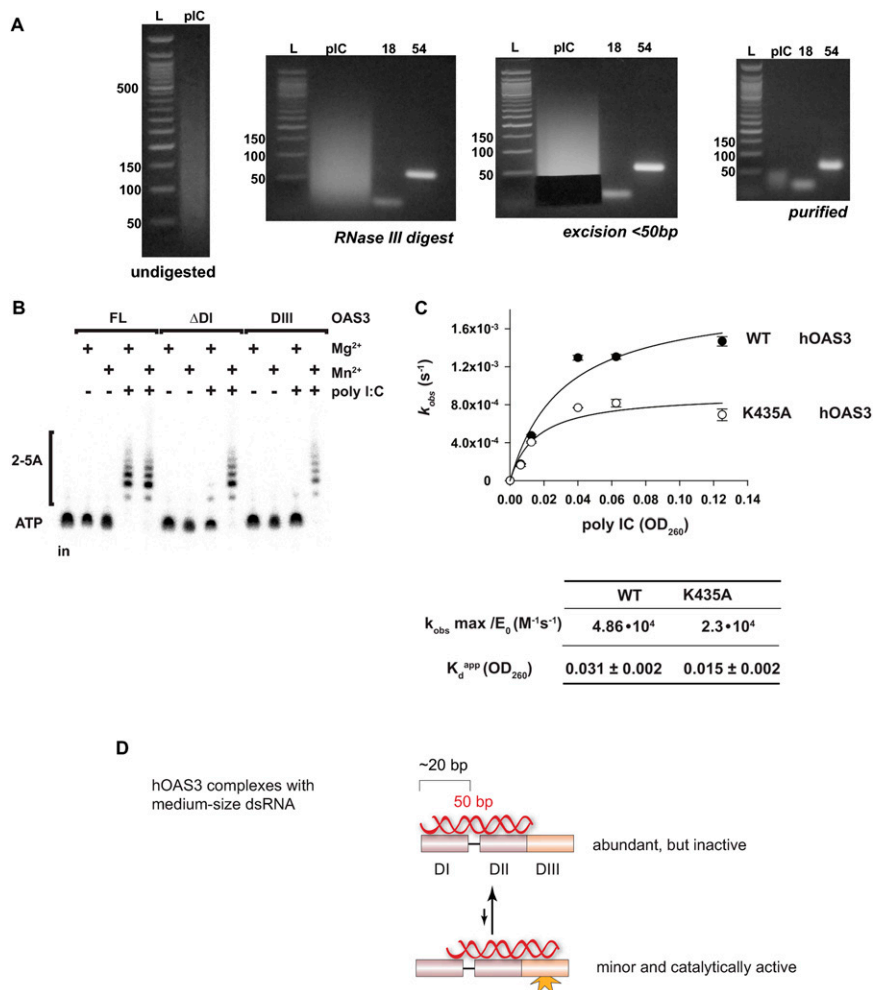

**Fig. S5.** Preparation of <50-bp poly I:C, and a model for its recognition by hOAS3. (A) Agarose gels (4%) of poly I:C (Left), poly I:C digested with RNase III (Center), and purified digested poly I:C (Right). Long (undigested) poly I:C used in this study ranges from less than 50 bp to ~500 bp, with a median size ~120 bp. Gel markers: L, 50-bp DNA ladder (New England Biolabs); 18, dsRNA18 (Methods); 54, a 54 bp in vitro transcribed dsRNA size control. (B) Two-hour end point activity assays with full length (FL) and truncated hOAS3 in the presence of Mg<sup>2+</sup> and Mn<sup>2+</sup>. We find that  $\Delta$ DI has robust activity in the presence of Mn<sup>2+</sup>, confirming that it is properly folded and well behaved. (C) Mutagenesis of a predicted dsRNA-binding contact in domain DII of hOAS3 (see also Fig. S3). Reactions were conducted as in Fig. 4B. (D) A proposed model for recognition of medium-size poly I:C by hOAS3, which explains the low specific activity with shorter dsRNA.





**Table S1. Data collection and refinement statistics**

Human OAS3.DI•dsRNA19

|                                                     |                      |
|-----------------------------------------------------|----------------------|
| Data collection                                     |                      |
| Space group                                         | P2 <sub>1</sub>      |
| Cell dimensions                                     |                      |
| <i>a</i> , <i>b</i> , <i>c</i> , Å                  | 48.7, 104.7, 63.8    |
| $\alpha$ , $\beta$ , $\gamma$ , °                   | 90, 98, 90           |
| Resolution, Å                                       | 43.82–2.0 (2.1–2.0)* |
| R-meas, %                                           | 6.6 (67.4)           |
| CC(1/2)                                             | 99.9 (88.9)          |
| <i>I</i> / $\sigma$ <i>I</i>                        | 21.33 (3.25)         |
| Completeness, %                                     | 99.8 (100)           |
| Redundancy                                          | 6.27 (6.25)          |
| Refinement                                          |                      |
| Resolution, Å                                       | 2.0                  |
| No. unique reflections                              | 42,802 (5,835)       |
| <i>R</i> <sub>work</sub> / <i>R</i> <sub>free</sub> | 0.1818/0.2113        |
| No. atoms                                           |                      |
| Protein                                             | 2,707                |
| dsRNA19                                             | 799                  |
| Water                                               | 876                  |
| B-factors                                           |                      |
| Protein                                             | 48.06                |
| dsRNA19                                             | 84.87                |
| r.m.s. deviations                                   |                      |
| Bond lengths, Å                                     | 0.007                |
| Bond angles, °                                      | 0.997                |
| Ramachandran plot, %                                |                      |
| Favored                                             | 92                   |
| Allowed                                             | 8                    |
| Disallowed                                          | 0.0                  |

A single crystal was used for data collection.

\*Highest resolution shell is shown in parenthesis.
